# Supplementary material for: Do polystyrene nanoplastics aggravate the toxicity of single contaminants (okadaic acid)? Using AGS cells as a biological model
Source: Royal Society of Chemistry journal article supplement (doi:10.1039/d1en00688f), 2021-01-01
Supplement: d1en00688f2.pdf [file d1en00688f2.pdf]

# **Does polystyrene nanoplastics aggravate the toxicity of single contaminants (okadaic acid)? Using AGS cells as a biological model**

Peichun Lin <sup>a,b</sup>, Zifan Lu <sup>a,b</sup>, Yuanyuan Zhang <sup>b</sup>, Xiuchun Liao <sup>a</sup>, Lei He <sup>a</sup>, Yitao Guo <sup>a</sup>, Chunxia Zhou <sup>b,c</sup>, Zhong-Ji Qian <sup>a,b</sup>, Pengzhi Hong <sup>b,c</sup>, Yan-Qiu Liang <sup>a,b</sup>, Lei Ren <sup>b,d</sup>, Shengli Sun <sup>a</sup> and Chengyong Li <sup>a,b,\*</sup>

<sup>a</sup> School of Chemistry and Environment, Guangdong Ocean University, Zhanjiang 524088, China

<sup>b</sup> Shenzhen Institute of Guangdong Ocean University, Shenzhen, Guangdong 518114, China

<sup>c</sup> College of Food Science and Technology, Guangdong Ocean University, Zhanjiang 524088, China

<sup>d</sup> College of Coastal Agricultural Sciences, Guangdong Ocean University, Zhanjiang 524088, China

\* Corresponding author: Chengyong Li

E-mail address: [cyli@gdou.edu.cn](mailto:cyli@gdou.edu.cn)

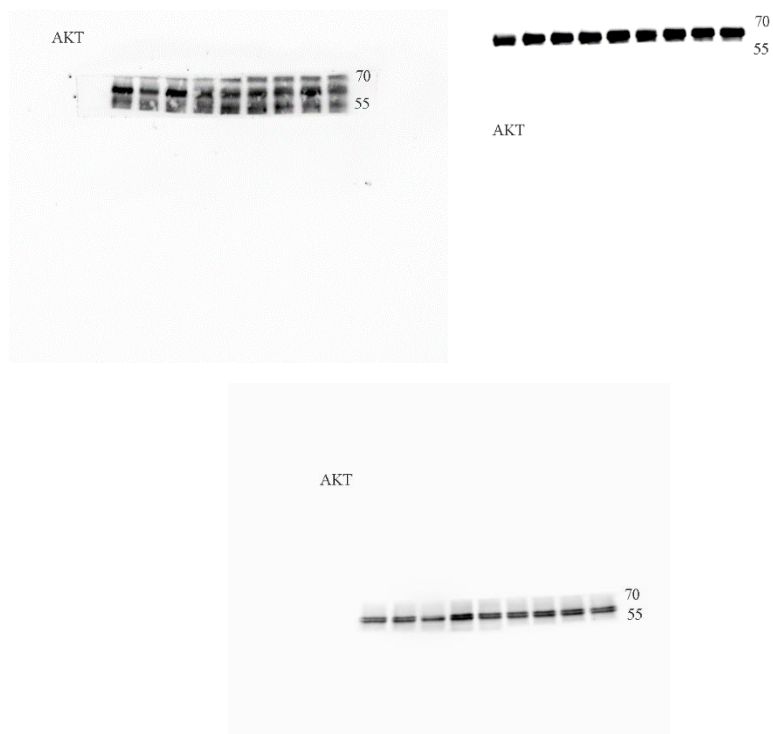

Fig. 1 The Western Bolt image of AKT

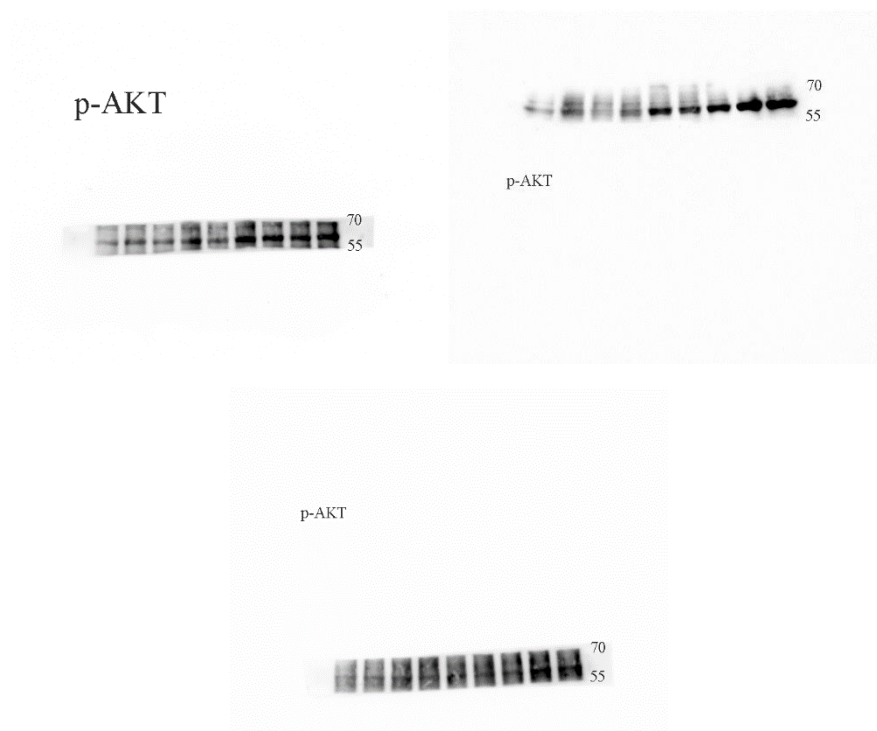

Fig. 2 The Western Bolt image of p-AKT

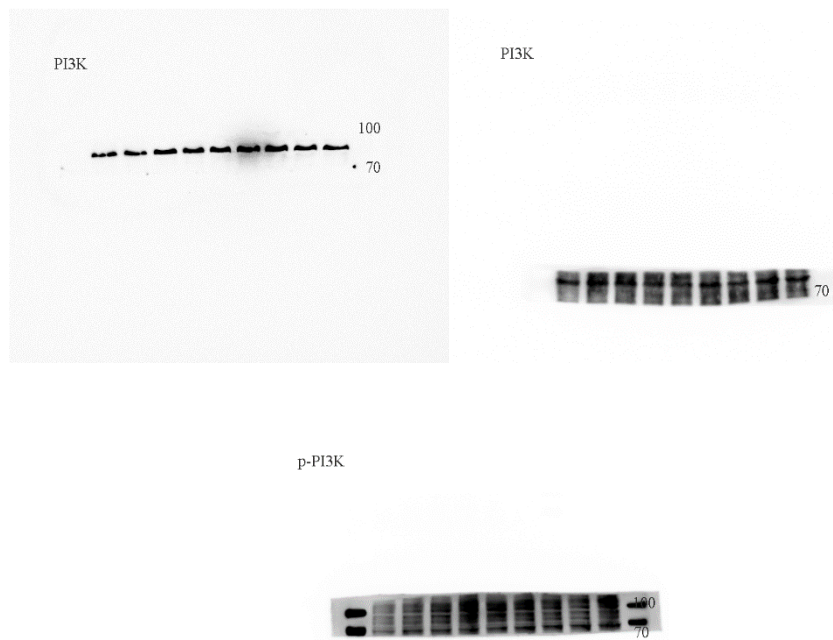

Fig. 3 The Western Bolt image of PI3K

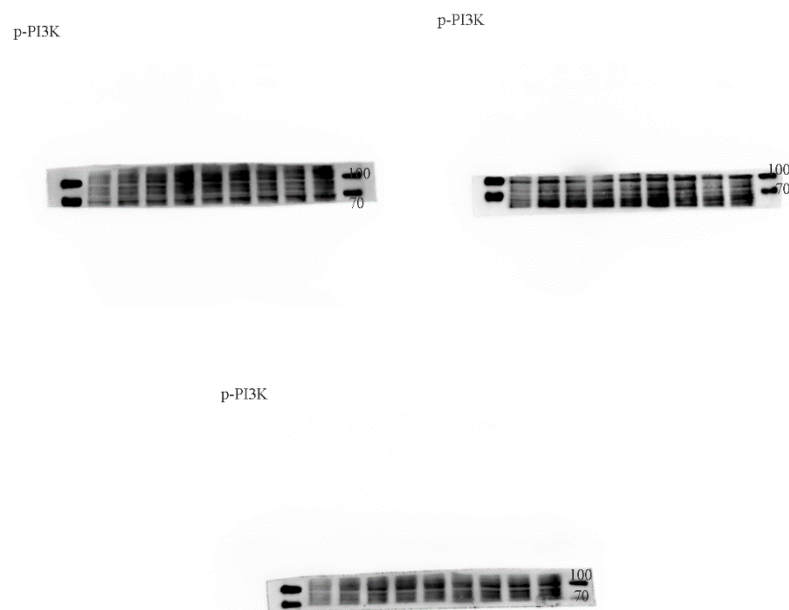

Fig. 4 The Western Bolt image of p-PI3K

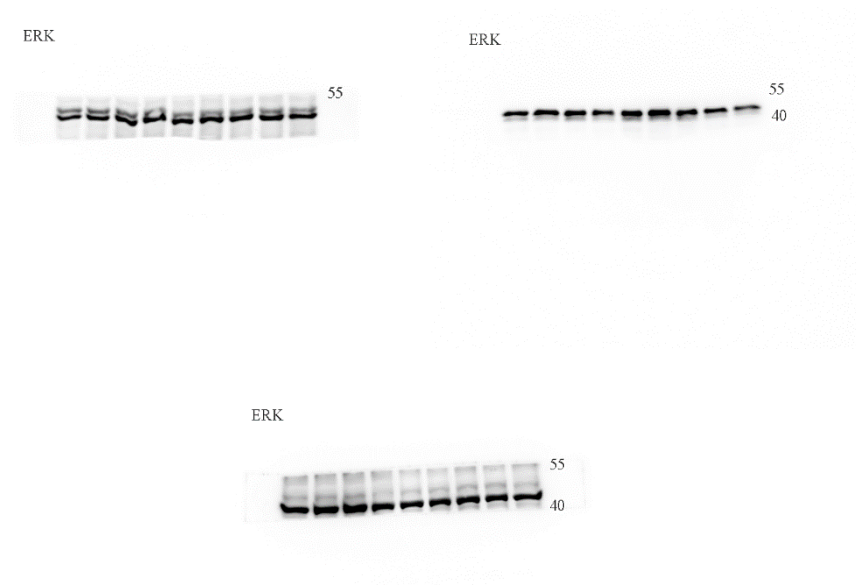

Fig. 5 The Western Bolt image of ERK

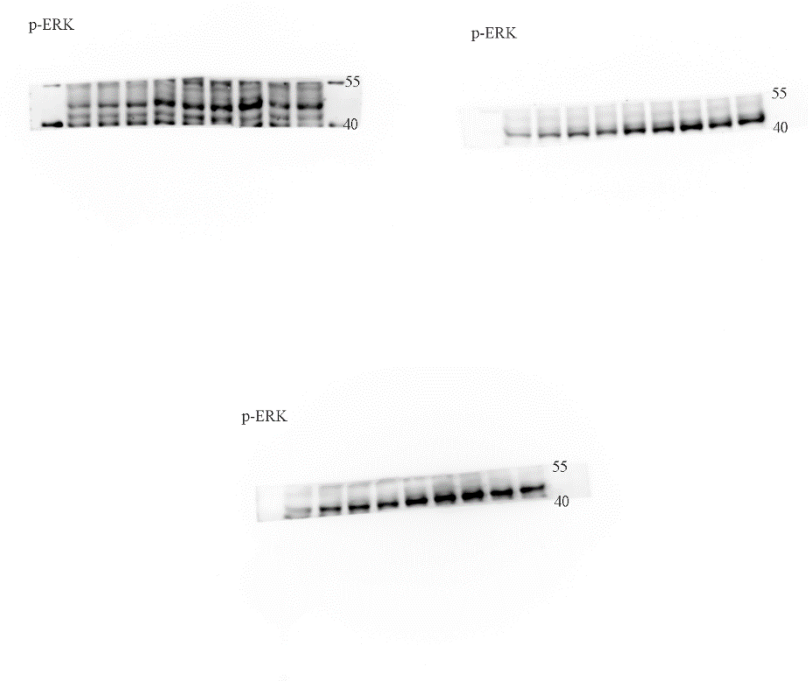

Fig. 6 The Western Bolt image of p-ERK

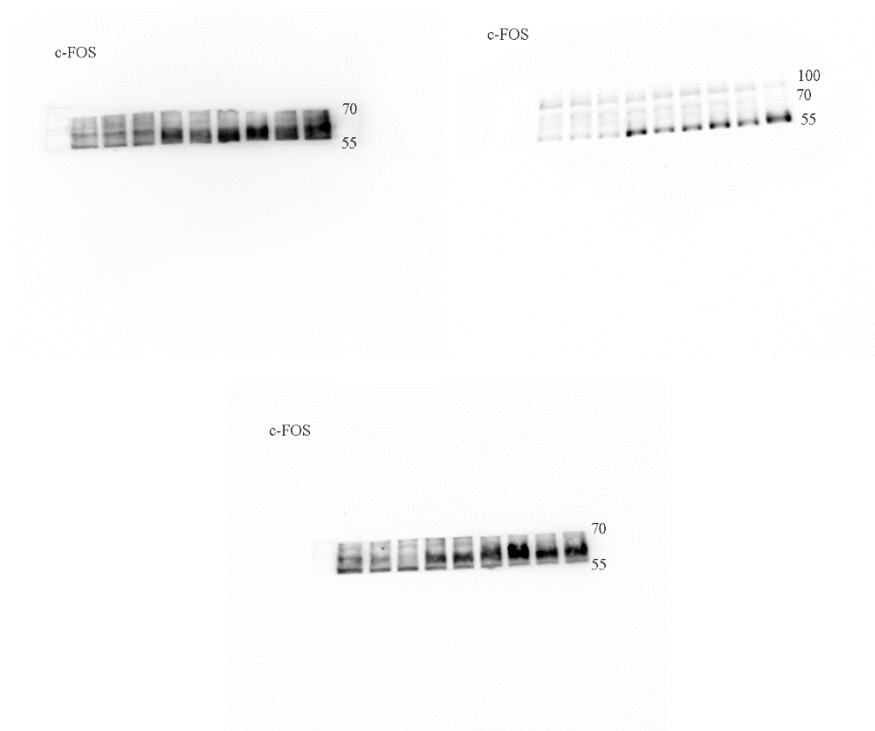

Fig. 7 The Western Bolt image of c-FOS

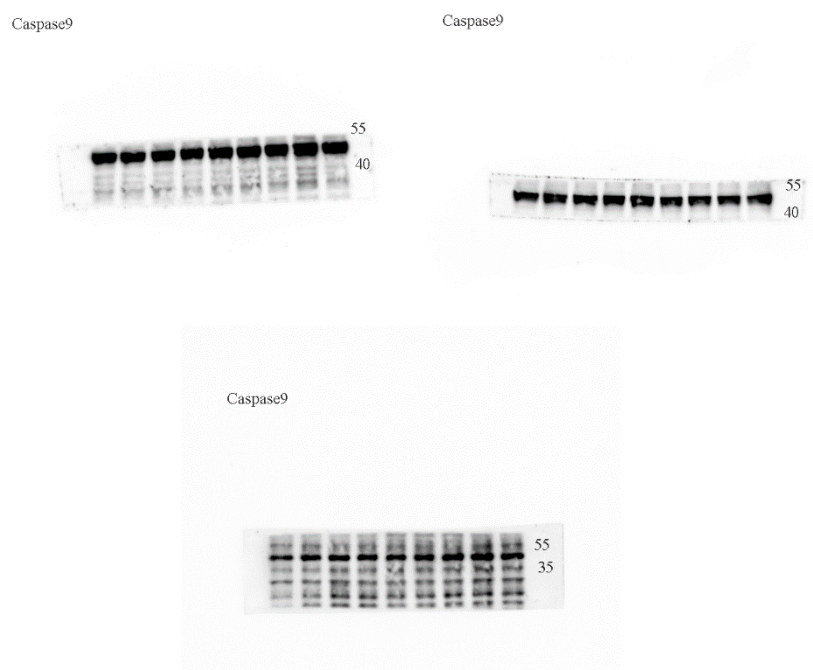

Fig. 8 The Western Bolt image of Caspase9

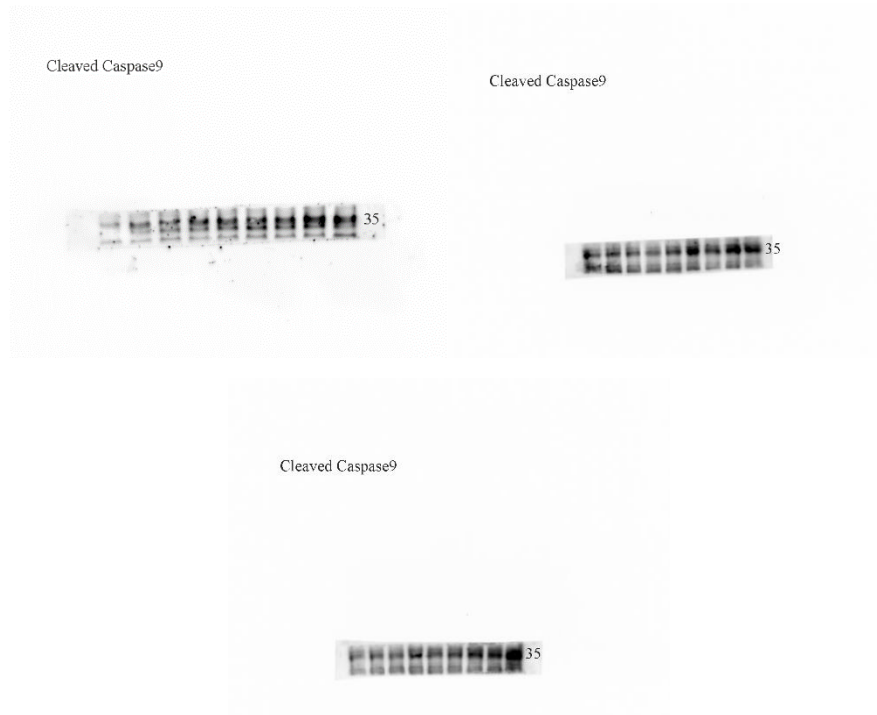

Fig. 9 The Western Bolt image of Cleaved Caspase9

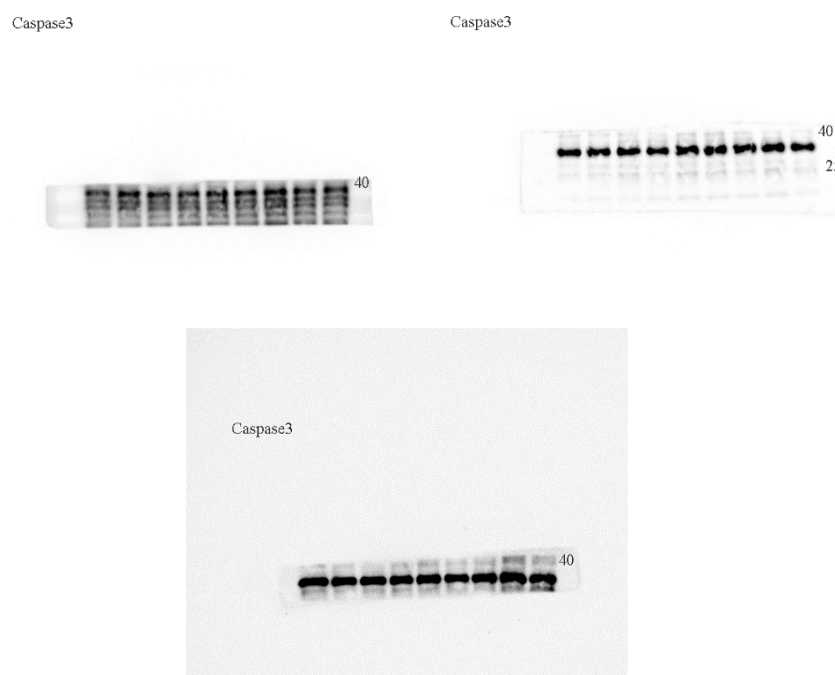

Fig. 10 The Western Bolt image of Caspase3

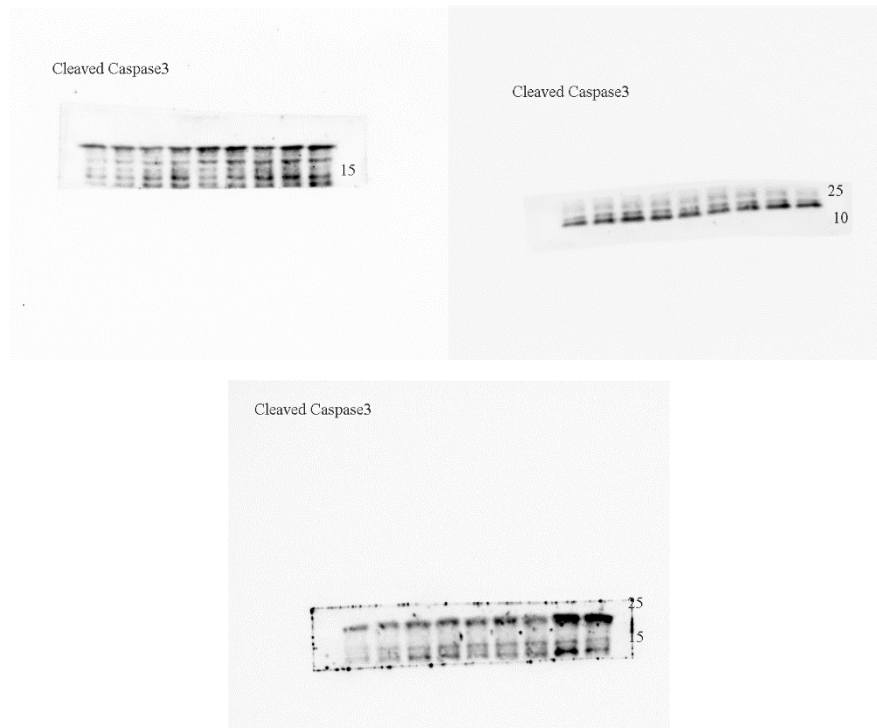

Fig. 11 The Western Bolt image of Cleaved Caspase3

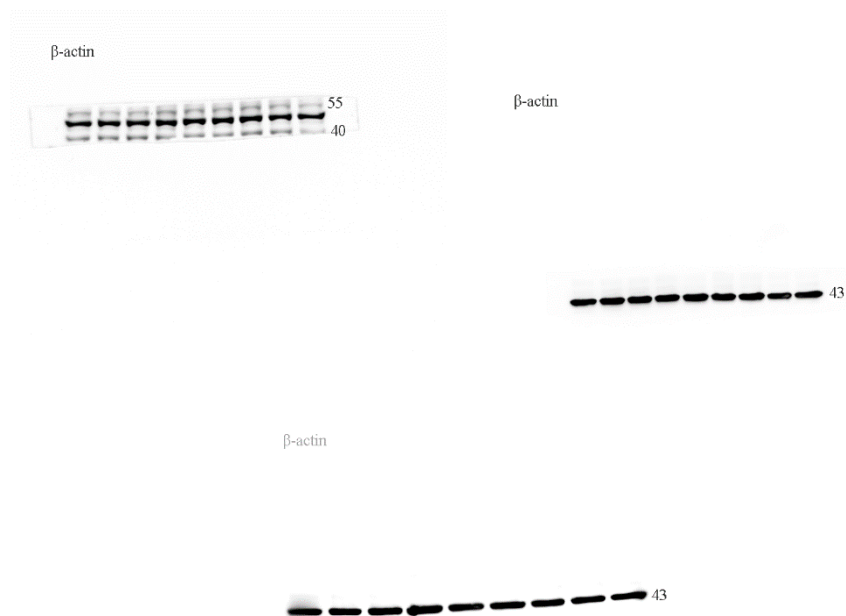

Fig. 12 The Western Bolt image of  $\beta$ -actin
